# Supplementary material for: Ancient Great Wall Building Materials Reveal Paleoenvironmental Changes in Northwestern China
Source: Research Square preprint supplement (doi:10.21203/rs.3.rs-390056/v1), 2021-04-14
Supplement: Supplementary file 1 [file 47f4f4df6824f55ce52c810f.xlsx]

## Sheet: Sup. Table 1
	Supplementary Table 1. Site locations and Sample Isotope and Chain Length Distribution Data
	Site	Latitude	Longitude	Sample ID	Reed Age	δ¹³C	Corrected δ¹³C	δ¹⁵N	ACL₂₁-₃₃	CPI₂₁-₃₃
	1: Han Dynasty Great Wall segment	40.567	96.4192	XJP16-1	Ancient	-23.94		5.636
		40.567	96.4192	XJP16-2	Ancient	-24.3		4.251
		40.567	96.4192	XJP16-3	Modern	-26.52	-24.62		27.069	6.22402
		40.567	96.4192	XJP16-4	Modern	-24.53	-22.63		27.5301	5.40244
		40.567	96.4192	XJP16-5	Modern	-24.36	-22.46		28.1669	6.17951
	2: Beacon tower near Site 1	40.5764	96.3898	XJP16-6	Ancient	-22.85		6.726	28.6572	11.65
	3: Beacon tower near Guazhou town	40.2459	95.154	XJP16-7	Ancient	-24.33		13.049	27.7547	7.3418
		40.2459	95.154	XJP16-8	Ancient	-23.62		6.735	28.2137	11.2472
	4: Xijiandun Beacon Tower	40.4192	94.7381	XJP16-9	Ancient	-23.21		11.549
		40.4192	94.7381	XJP16-10	Ancient	-23.39		13.514
		40.4192	94.7381	XJP16-11	Ancient	-22.63		9.308
	5: Cang Ting Sui Beacon Tower at Yumenguan	40.4057	93.9712	XJP16-12	Ancient	-24.15		7.006	27.981	6.60747
		40.4057	93.9712	XJP16-13	Ancient	-23.3		7.182	27.685	7.64208
		40.4057	93.9712	XJP16-14	Ancient	-23.46		8.774	27.2347	5.60883
		40.4057	93.9712	XJP16-15	Ancient
		40.4057	93.9712	XJP16-16	Ancient	-24.37		7.168	27.885	4.40415
		40.4057	93.9712	XJP16-17	Ancient	-24.18		13.97	27.6027	4.61494
		40.4057	93.9712	XJP16-18	Ancient	-23.53		5.807	30.0072	15.1358
		40.3562	93.8723	XJP16-19	Modern	-26.16	-24.26		27.6777	5.3123
		40.3562	93.8723	XJP16-20	Modern	-25.94	-24.04		30.9603	16.3969
	6: Great Wall Heritage Site	40.3556	93.8146	XJP16-21	Ancient	-23.89		1.488	29.6661	10.473
		40.3556	93.8146	XJP16-22	Ancient	-24.19		0.785	29.2032	12.3559
		40.3556	93.8146	XJP16-23	Ancient	-23.04		3.674	28.4925	2.62121
	7: Majuanwan Great Wall segments	40.3437	93.741	XJP16-24	Ancient	-24.01		4.503	28.3182	4.95765
		40.3437	93.741	XJP16-25	Ancient	-24.22		5.039	27.9512	5.57103
		40.3437	93.741	XJP16-26	Ancient	-24		8.774	27.7267	2.92534
		40.3437	93.741	XJP16-27	Ancient	-22.74		7.2
		40.3437	93.741	XJP16-28	Ancient	-23.96		6.978
		40.3437	93.741	XJP16-29	Ancient	-22.79		6.085	29.127	2.45353
		40.3437	93.741	XJP16-30	Ancient	-24.34		3.646	27.721	4.56004
		40.3437	93.741	XJP16-31	Ancient	-23.81		7.214	29.3905	9.43675
		40.3437	93.741	XJP16-32	Ancient	-24.65		4.283	28.2824	10.6681
		40.3407	93.758	XJP16-33	Modern	-25.78	-23.88		26.521	7.76151
		40.3407	93.758	XJP16-34	Modern	-26.1	-24.2		29.7951	23.2443
	8: Milan Castle Heritage Site	39.2266	88.9703	XJP16-37	Ancient	-24.74		21.52	28.5867	5.80505
		39.2266	88.9703	XJP16-38	Ancient	-22.81		27.432	28.5989	6.35717
		39.2266	88.9703	XJP16-39	Ancient	-24.42		33.547	30.0052	19.3181
	9: Buddha Tower, Yingpan City Heritage Site	40.9843	87.819	XJP16-40-1	Ancient	-24.89		9.077	26.9152	14.022
		40.9843	87.819	XJP16-40-2	Ancient	-24.82		5.73	27.6581	7.77114
		40.9843	87.819	XJP16-40-3	Ancient	-23.72		9.239	24.7108	2.70743
		40.9843	87.819	XJP16-41	Modern	-23.71	-21.81		27.2814	5.89655
		40.9843	87.819	XJP16-42	Modern	-23.04	-21.14		28.3787	3.83118
	10: City wall, Yingpan City Heritage Site	40.9948	87.8106	XJP16-43	Ancient	-24.42		4.737
		40.9948	87.8106	XJP16-44	Ancient	-24.57		1.555	22.7575	2.04738
		40.9948	87.8106	XJP16-45-1	Ancient				28.9621	7.25698
		40.9948	87.8106	XJP16-45-2	Modern	-24.17	-22.27	13.358	29.1646	7.69204
	11: Yakelun Beacon Tower	41.4572	86.4188	XJP16-46	Ancient	-24.08		10.195	29.5246	8.16721
		41.4572	86.4188	XJP16-47	Ancient	-23.94		12.466	28.154	5.34183
	12: Sunji Beacon Tower	41.3971	86.5335	XJP16-48	Ancient	-23.51		11.358	27.8149	6.00068
		41.3971	86.5335	XJP16-49	Ancient	-24		1.342	26.769	4.82608
		41.3971	86.5335	XJP16-50	Ancient	-24.63		12.681	28.3592	9.00885
	13: Tahaqi Beacon Tower	42.285	86.9667	XJS16-51	Ancient
	14: Sishilidadun Beacon Tower	42.0771	87.3499	XJP16-52	Ancient	-25.04		19.575
		42.0771	87.3499	XJP16-53	Ancient	-23.1		11.593	24.2547	2.95964
		42.0771	87.3499	XJP16-54	Ancient	-25.27		16.401
		42.0771	87.3499	XJP16-55	Modern	-24.31	-22.41	0.269	28.027	5.57153
		42.0771	87.3499	XJP16-56	Modern	-22.74	-20.84	0.212	26.448	4.92039
