# Supplementary material for: Ancient Great Wall Building Materials Reveal Paleoenvironmental Changes in Northwestern China
Source: Research Square preprint supplement (doi:10.21203/rs.3.rs-390056/v1), 2021-04-14
Supplement: Supplementary file 2 [file fa1f5eb8bd97b25c4e0ec408.xlsx]

## Sheet: Sup. Table 2
	Supplementary Table 2. Identified Py-GC-MS Compounds			Peak Order in Chromatogram*
	Compound	Fragments	Origin	Modern Culm (L5m)	Modern Leaf (L5m)	Modern Culm (L8)	Modern Leaf (L8)	Ancient Culm (L7)	Ancient Culm (L12)	Ancient Culm (L5-20)	Ancient Culm (L5-4)	Ancient Culm (L7-9)	Ancient Culm (L7-5)
	Furfural	96	Polysaccharide	1	1	1	1	1	1	1	1	1
	2-Furanmethanol	98, 81, 55, 69	Polysaccharide	2	2		2	2		2	2
	2(5H)-Furanone	55, 84	Polysaccharide	3				3		3	3
	1,2-Cyclopentanedione	98, 55, 69	Polysaccharide						2
	2-Furancarboxaldehyde, 5-methyl- ?	110, 57, 109, 53, 98, 69	Polysaccharide	4	3		4	4			4
	4-Hydroxy-5,6-dihydro-(2H)-pyran-2-one	114, 58, 84	Polysaccharide	5	4	2	5	5	3	4	5
	1,2-Cyclopentanedione, 3-methyl-	112, 55, 69, 83	Polysaccharide	6	5			6	4	5	6	3	2
	2,5-Furandicarboxaldehyde	124, 95	Polysaccharide	7
	Benzofuran, 2,3-dihydro-	120, 91, 65	Polysaccharide	9		6	8	8		9		5	5
	Levoglucosan	60, 73	Polysaccharide	14	11	9	12	12		12	9	9
	Phenol	94, 66	Lignin										1
	Mequinol	124, 109, 81	Lignin			3
	Phenol	94, 66	Lignin				6		5
	Phenol, 3-methyl-	57, 108, 107, 71	Lignin										3
	Phenol, 4-methyl-	107, 77	Lignin				7
	Phenol, 2-methoxy-	109, 124, 81	Lignin	8	6	4		7	6	7		4	4
	Phenol, 4-ethyl-	107, 122, 77	Lignin			5
	1,2-Benzenediol	110, 64	Lignin							8
	Phenol, 4-ethyl-	107, 122, 77	Lignin	10	7
	1,2-Benzenediol, 3-methoxy-	140, 125, 97	Lignin					9					6
	2-Methoxy-4-vinylphenol	150, 135, 77, 107	Lignin	11	8	7	10	10		10		6	7
	Phenol, 2,6-dimethoxy-	154, 139, 96, 111	Lignin	12	9			11		11		7	8
	Vanillin	152, 151, 81, 109, 123	Lignin	13					7			8	9
	Phenol, 2-methoxy-4-(1-propenyl)-	164, 77, 103, 149, 91, 131	Lignin			8			8
	Phenol, 4-methoxy-3-(methoxymethyl)-	168, 153, 125	Lignin										10
	Apocynin	151, 166, 123	Lignin						9				11
	Benzaldehyde, 4-hydroxy-3,5-dimethoxy-	182, 181, 111	Lignin									10	12
	Phenol, 2,6-dimethoxy-4-(2-propenyl)-	194, 91, 119, 77	Lignin	15		10		13	10	13		11	13
	Ethanone, 1-(4-hydroxy-3,5-dimethoxyphenyl)-	181, 196, 153	Lignin					14	11	14		12	14
	Desaspidinol	167, 210	Lignin			11		15	12	15		13	15
	3,5-Dimethoxy-4-hydroxycinnamaldehyde	208, 165, 137, 180, 177	Lignin						13
	dl-Leucine, N-[(phenylmethoxy)carbonyl]-	57, 108, 107	Amino Acid							6
	Indole	117, 90, 89	Amino Acid				9
	Indole, 3-methyl-	130, 131	Amino Acid		10		11
	1H-Indol-4-ol, 3-methyl-	146	Amino Acid				13
	2H-Indol-2-one, 1,3-dihydro-3,3-dimethyl-	146, 161	Amino Acid				14
	9H-Pyrido[3,4-b]indole	168, 140, 114	Amino Acid		14
	Dodecanoic acid	73, 60, 129, 157, 200	Fatty Acid		12
	Tetradecanoic acid	37, 60, 129, 185, 228	Fatty Acid		13
	n-Hexadecanoic (palmitic) acid	73, 60, 129, 256, 213	Fatty Acid	16	15	12	15	16	14	16	10
	Octadecanoic (stearic) acid	73, 60, 129, 284, 185, 241	Fatty Acid	17	16	13	16	17	15	17
	*The number in each row represents the identifiable peak on the chromatogram starting with the earliest retention time. For example, peak 1 in Modern Culm (L5) corresponds to the first Polysaccharide peak on Figure 3 Modern Culm Phragmites australis Roadside (L5m).
